# Supplementary material
Source: MDPI journal article supplement (https://www.mdpi.com/2073-4352/13/5/718)
Supplement: s1 [file s1]

## Supplementary Materials

### Electrochemical Properties and Perspectives of Nickel(II) and Cobalt(II) Coordination Polymers—Aspects and an Application in Electrocatalytic Oxidation of Methanol

Ivana Škugor Rončević<sup>1</sup>, Marijo Buzuk<sup>1</sup>, Boris-Marko Kukovec<sup>2</sup>, Vesna Sokol<sup>2</sup>, Maša Buljac<sup>3</sup>, Nives Vladislavić<sup>1,\*</sup>

<sup>1</sup> Department of General and Inorganic Chemistry, Faculty of Chemistry and Technology, University of Split, Ruđera Boškovića 35, 21000 Split, Croatia; skugor@ktf-split.hr (I.Š.R), buzuk@ktf-split.hr (M.B.) nives@ktf-split.hr (N.V.)

<sup>2</sup> Department of Physical Chemistry, Faculty of Chemistry and Technology, University of Split, Ruđera Boškovića 35, 21000 Split, Croatia; bmkukovec@ktf-split.hr (B.-M.K.), vsokol@ktf-split.hr (V.S.)

<sup>3</sup> Department of Environmental Chemistry, Faculty of Chemistry and Technology, University of Split, Ruđera Boškovića 35, 21000 Split, Croatia, masa@ktf-split.hr (Ma.B.)

\* Correspondence: \*nives@ktf-split.hr (N.V.)

# 1. EDS analysis

An energy-dispersive spectrum (EDS) was recorded for the Ni(II) (Figure S1) and Co(II) (Figure S2) polymers.

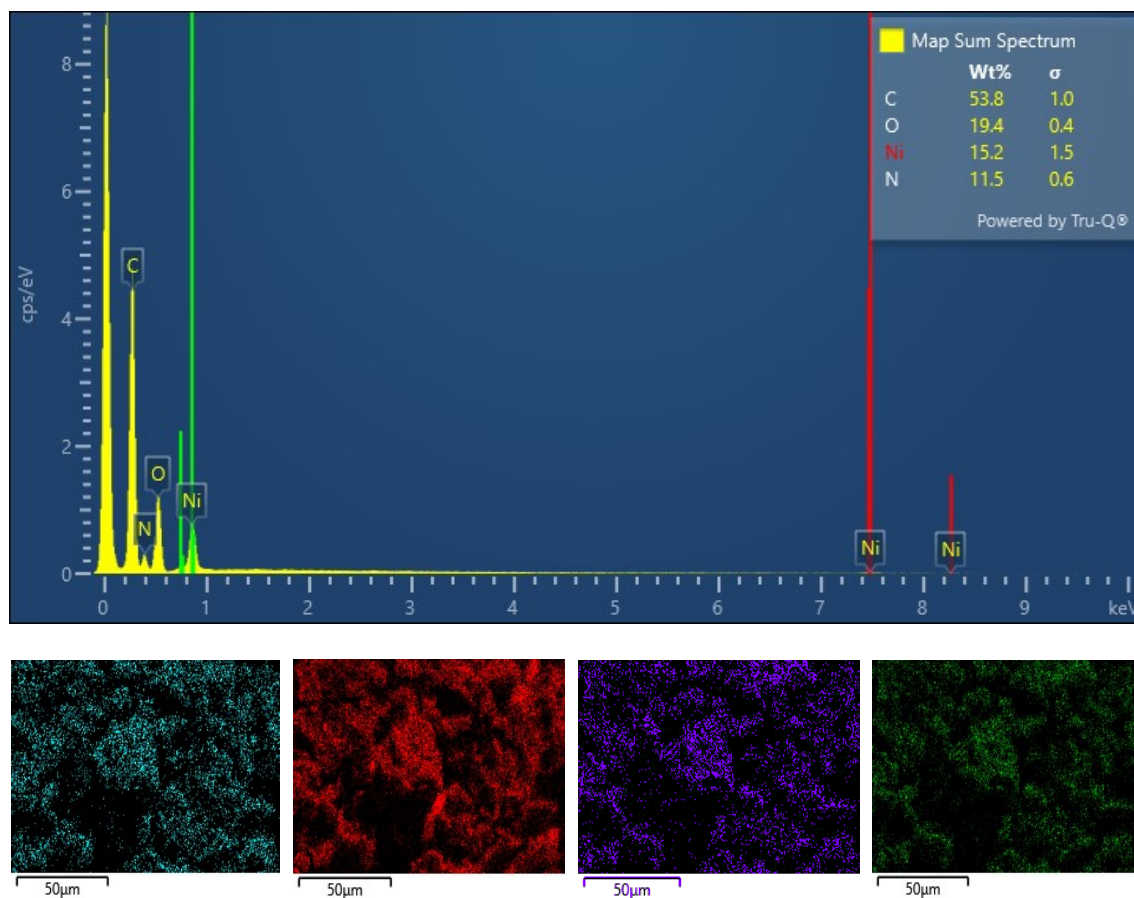

**Figure S1.** EDS analysis: Nickel - Carbon - Nitrogen - Oxygen.

**Table S1.** Table of elements ratio - theoretical vs EDS

|    | Theoretical mass ratio<br>according to formula<br>% | Ratio<br>theoretical | EDS<br>mass ratio | Ratio<br>EDS |
|----|-----------------------------------------------------|----------------------|-------------------|--------------|
| Ni | 9.83%                                               | 2.1                  | 15.2              | 2.6          |
| C  | 44.07%                                              | 9.3                  | 53.8              | 9.3          |
| O  | 32.04%                                              | ~7                   | 19.4              | 3.3          |
| N  | 9.33%                                               | 2                    | 11.5              | 2            |
| H  | 4.71%                                               | 1                    | --                |              |

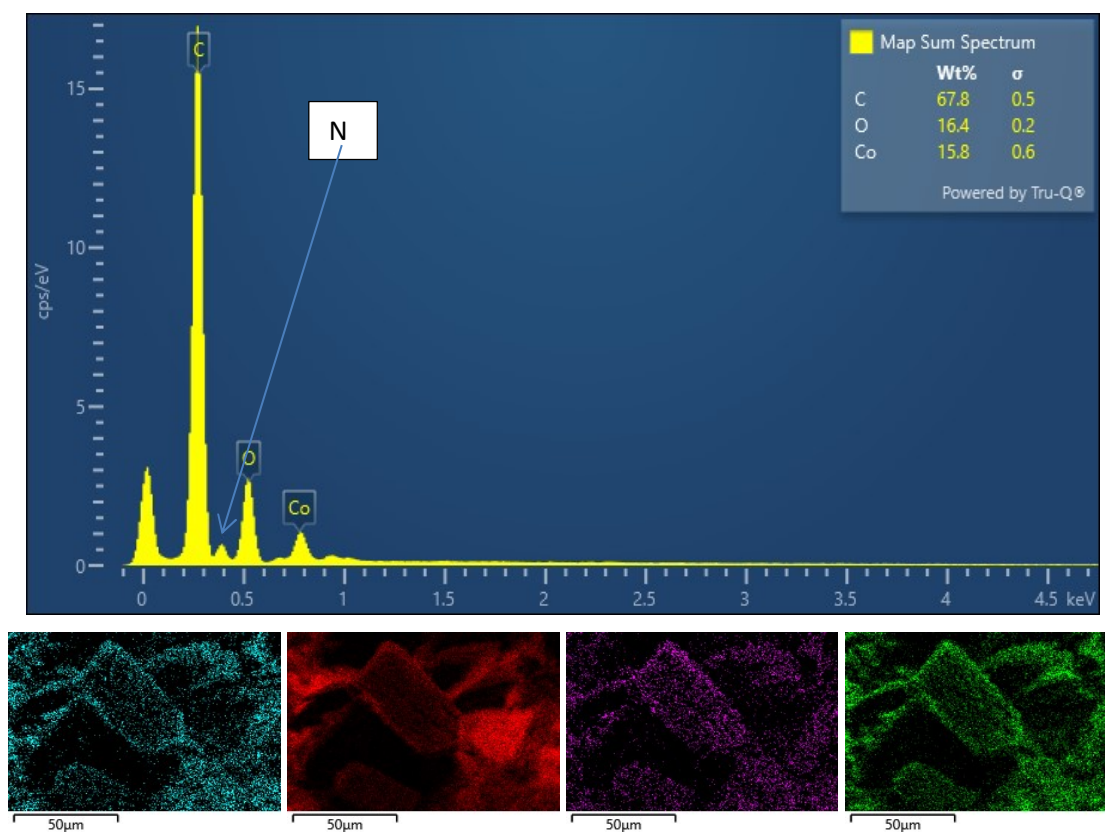

**Figure S2.** EDS analysis: Cobalt - Carbon - Nitrogen - Oxygen.

**Table S2.** Table of elements ratio - theoretical vs EDS

|    | Theoretical mass ratio<br>according to formula<br>% | Ratio<br>theoretical | EDS<br>mass ratio | Ratio<br>EDS |
|----|-----------------------------------------------------|----------------------|-------------------|--------------|
| Co | 9.8                                                 | 2.1                  | 15.8              | 2.6          |
| C  | 44.0                                                | 9.3                  | 67.8              | 9.3          |
| O  | 32.0                                                | ~7                   | 16.4              | 3.3          |
| N  | 9.3                                                 | 2                    | Assumption 1-5    | 2            |
| H  | 4,71%                                               | 1                    | --                |              |

## IR Spectra

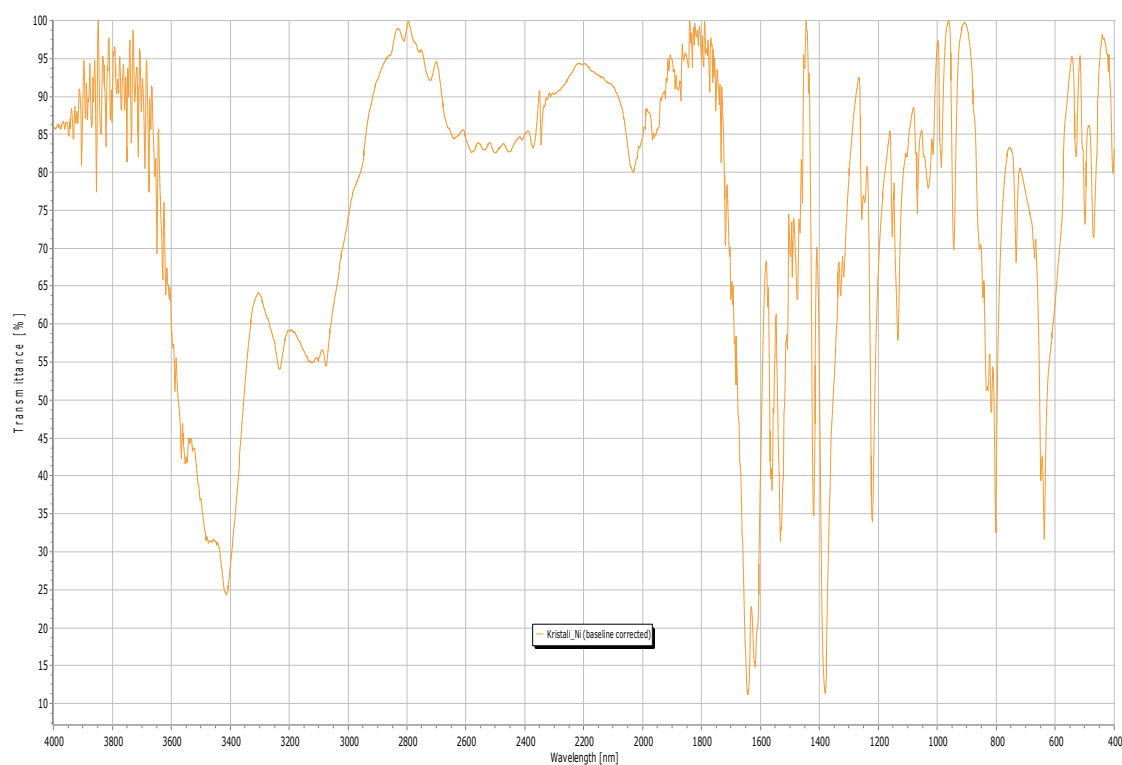

**Figure S3.** IR spectrum of  $\{[\text{Ni}(4,4'\text{-bpy})(\text{H}_2\text{O})_4](6\text{-Onic})_2 \cdot 2\text{H}_2\text{O}\}_n$

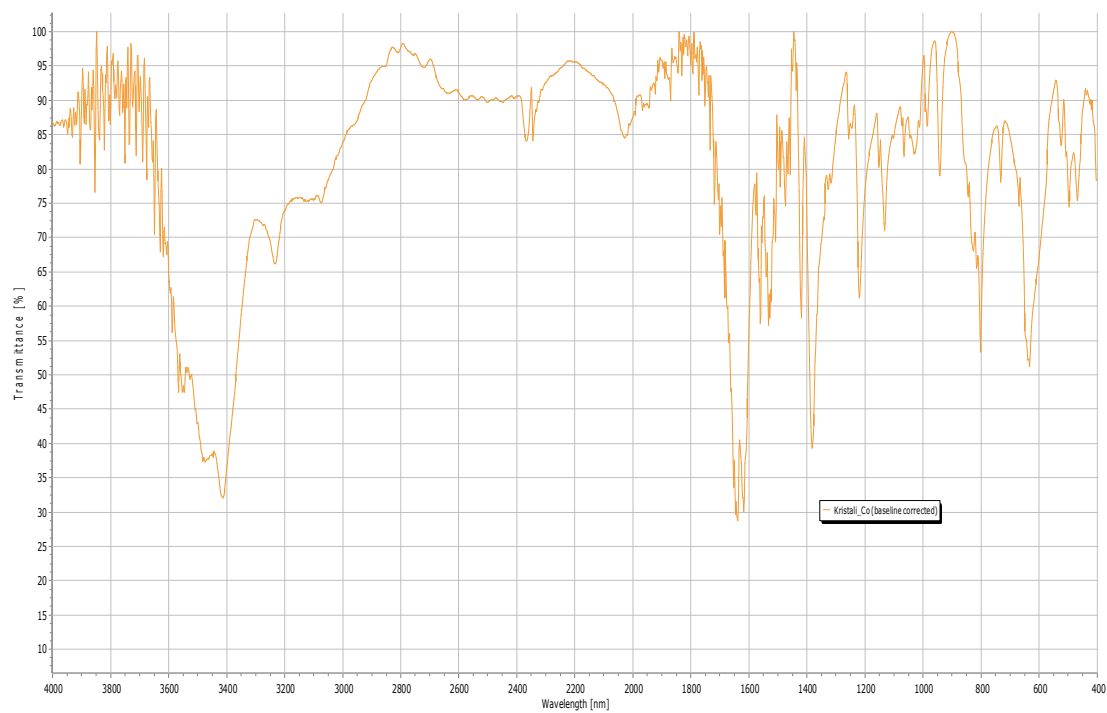

**Figure S4.** IR spectrum of  $\{[\text{Co}(4,4'\text{-bpy})(\text{H}_2\text{O})_4](6\text{-Onic})_2 \cdot 2\text{H}_2\text{O}\}_n$

**Table S3.** The selected vibration bands in the IR spectra of  $\{[\text{Ni}(4,4'\text{-bpy})(\text{H}_2\text{O})_4](6\text{-Onic})_2 \cdot 2\text{H}_2\text{O}\}_n$  and  $\{[\text{Co}(4,4'\text{-bpy})(\text{H}_2\text{O})_4](6\text{-Onic})_2 \cdot 2\text{H}_2\text{O}\}_n$

| Wavenumber, $\text{cm}^{-1}$ |                | The assignation                                                                                                            |
|------------------------------|----------------|----------------------------------------------------------------------------------------------------------------------------|
| Ni(II)-polymer               | Co(II)-polymer |                                                                                                                            |
| 470                          | 469            | symmetric out-of-plane C-H deformation                                                                                     |
| 636                          | 631            |                                                                                                                            |
| 802                          | 802            |                                                                                                                            |
| 944                          | 942            | symmetrical deformation, C-O, C-N and in-plane stretching                                                                  |
| 1220                         | 1218           | C-OH stretching (Ph-OH) stretching                                                                                         |
| 1382                         | 1382           | symmetrical C=O stretching from the COO- group 1562 (m), 1530 (m), 1473 (w), 1422 (m), 1382 (m), [ $\nu_s(\text{COO}^-)$ ] |
| 1550                         | 1550           | stretching of the C-C bond of the aromatic ring                                                                            |
| 1643                         | 1639           | stretching C=O stretching of the C=C and C=N bonds of the aromatic ring                                                    |
| 2033                         | 2030           | asymmetric C=O stretching from the COO- group of a carboxylic acid                                                         |
| 3076                         | 3074           | asymmetrical stretching C-H, C-N C-O bonds in aromatics                                                                    |
| 3233                         | 3233           | [ $\nu(\text{O-H})$ ]                                                                                                      |
| 3414 (m)                     | 3413 (m)       |                                                                                                                            |
| 3854                         | 3854           |                                                                                                                            |
